1 **Warming-enhanced priority effects at population and community levels in aquatic**  
2 **bacteria**

3

4 Máté Vass\*, Anna J. Székely, Eva S. Lindström, Omneya A. Osman, Silke Langenheder  
5 Department of Ecology and Genetics/Limnology, Uppsala University, Norbyvägen 18 D,  
6 75236 Uppsala, Sweden

7 \*Corresponding author contact information: [mate.vass@ebc.uu.se](mailto:mate.vass@ebc.uu.se)

8

9 **Running title:** Warming-enhanced priority effects

10

11 **Keywords:** historical contingency, warming, dispersal, colonization

12

13 **Abstract**

14 The immigration history of communities can profoundly affect community composition. For  
15 instance, early-arriving species can have a lasting effect on community structure by reducing  
16 the immigration success of late-arriving ones through priority effects. Warming could  
17 possibly enhance priority effects by increasing growth rates of early-arriving species. Here we  
18 implemented a full-factorial experiment with aquatic bacteria where both temperature and  
19 dispersal rate of a better adapted community were manipulated to test their effects on the  
20 importance of priority effects. Our results suggest that priority effects might be strengthened  
21 by increasing temperature as warming increased the resistance of recipient communities  
22 against dispersal, and decreased the relative abundance of successfully established late-  
23 arriving species. However, warming-enhanced priority effects were not always found and  
24 their strengths differed between recipient communities and dispersal rates. These findings  
25 highlight the importance of context dependent studies of priority effects.

## 26 **Introduction**

27

28           Variation in the composition of ecological communities can be the product of  
29 historical processes such as immigration, extinction and speciation [1]. The sequence and  
30 timing in which species or their propagules reach an ecological community (immigration  
31 history) can profoundly affect community structures and maintain diversity of communities  
32 via a process known as priority effects [2]. Priority effects imply that early-arriving species  
33 gain advantage and become resistant to invasion of late-arriving ones, and therefore maintain  
34 high relative abundances over time [3]. Priority effects are enforced by mechanisms that  
35 increase the ecological opportunity of the early-arriving species. For instance, factors such as  
36 time lag between arrivals, high growth and evolutionary rates of the early-arriving species  
37 (i.e., rapid local adaptation), are processes that reduce the establishment success of late-  
38 arriving species [4, 5]. Successful local adaptation by early-arriving species initiates strong  
39 priority effects that can even reduce the establishment success of late-arriving species that are  
40 otherwise well-adapted to the local environment [6]. On the other hand, priority effects can be  
41 absent or weak when the better adapted late-arriving species generate species replacements. In  
42 the latter case, dispersal initiates species sorting processes, which has been shown to occur  
43 even at very low rates of dispersal [7]. In general, strong priority effects are expected if  
44 growth rates and/or the adaptive potential of local communities are high in relation to the time  
45 it takes for better adapted species and/or dormant resident species to arrive or resuscitate and  
46 grow to become abundant community members [8].

47           The most likely reason for priority effects is that early-arriving species induce rapid  
48 niche-modification or preempt resources so that late-arriving species will not be able to  
49 successfully establish in a local community [9, 10]. Hence, any possible environmental factor  
50 that increases growth rates of early-arriving species could possibly enhance priority effects

51 [11, 12]. This includes the impact of ongoing climate change that leads to increased mean  
52 water surface temperatures [13]. For instance, a recent study by Grainger *et al.* (2018) has  
53 shown that priority effects can be temperature-dependent in aphid species under the projected  
54 IPCC temperature scenarios. In addition, results suggesting that warming might promote  
55 priority effects have been obtained from yeast [15] and zooplankton communities [16], but, in  
56 general, the number of studies on this topic is low.

57 Previous studies have demonstrated that organisms with high growth rates have the  
58 capability to facilitate strong priority effects [4, 9, 17], and therefore priority effects are  
59 expected to be more important in bacteria compared to other organism groups [5]. Results  
60 from several studies suggest that priority effects occur in a variety of aquatic bacterial  
61 communities [18–20], but their relationship to temperature remain unexplored. Furthermore,  
62 we lack knowledge about the identity of bacteria that are key players in either causing priority  
63 effects or being hindered in their establishment by them. Even though two recent studies  
64 aimed to identify distinct roles of a bacterial groups in priority effects during community  
65 succession in biofilm [21] and in experimental freshwater bacterial communities [19], it  
66 remains unclear whether the fates and roles of distinct bacteria in priority effects differ in  
67 response to warming.

68 Therefore, we performed a full-factorial experiment, where bacteria from three  
69 Swedish lakes were inoculated and grown in cell-free Baltic Sea medium at three temperature  
70 levels. These lake communities represented the early arrivals that were allowed to colonize  
71 the ‘foreign’ (Baltic Sea) medium to which they were not a priori adapted. After initial growth  
72 and establishment these communities became the ‘recipient communities’ that were exposed  
73 to invasion by Baltic Sea bacteria that were well-adapted to the incubation medium (i.e.,  
74 Baltic Sea medium). These late-arriving communities were dispersed into the recipient  
75 communities at three different rates. We generated the recipient communities using three lake

76 inocula that differed in their proximity to the Baltic Sea, as we expected that the distance of  
77 the origin of the early- and late-arriving communities might alter priority effects. At the end  
78 of the experiment, bacterial community composition was analyzed and the potential priority  
79 effects were investigated both at the community and population level (see Methods).

80 We hypothesized that warming results in stronger priority effects in bacterial  
81 communities, namely, that recipient communities grown at high temperature will be more  
82 resistant to dispersal of late-arriving species from the Baltic Sea. Moreover, recipient  
83 communities that are geographically closer to the Baltic Sea might harbor larger internal seed  
84 banks containing Baltic Sea bacteria and share the regional species pool with Baltic Sea to a  
85 greater extent than lakes further apart. Hence, we assumed that lakes geographically closer to  
86 the Baltic Sea would be more prone to maintain priority effects than more distant lakes due to  
87 their higher ratio of species adapted to the applied Baltic Sea medium.

88

89

## 90 **Material and methods**

91

### 92 *Experimental design*

93 In total, our experimental design resulted in 132 communities, three sets of recipient  
94 communities, each with four replicates exposed to three levels of dispersal and three  
95 temperatures. For each temperature there was a dispersal source with four replicates and a  
96 control with four replicates consisting of cell-free medium (Fig. 1).

97 For the preparation of the Baltic Sea incubation medium used in this experiment, 120  
98 L seawater was collected at the Swedish Baltic Sea coast on 19 June, 2018, at Barnens Ö (N  
99 59°55'11.9", E 18°54'52.2"). The water was filtered through a 20 µm net *in situ* to remove  
100 zooplankton and kept in dark at 4 °C overnight. Then, the medium was autoclaved (121 °C

101 for 40 mins) and its pH was adjusted to its original level (pH = 8.18) by HCl addition.  
102 Afterwards, the medium was filtered through sterile 0.2  $\mu\text{m}$  47 mm membrane filters (Supor-  
103 200, Pall Corporation, Port Washington, NY, USA), and distributed into sterile 1,000 mL  
104 glass bottles, and autoclaved once more at 121  $^{\circ}\text{C}$  for 20 minutes in order to achieve a sterile  
105 cell-free incubation medium. Until inoculation, the bottles containing the sterile medium were  
106 kept in dark at 4  $^{\circ}\text{C}$ .

107 For the preparation of the inoculum communities, water samples were collected from  
108 three Swedish lakes (Lötsjön – N 59°51'44.0", E 17°56'37.6"; Erken – N 59°50'09.2", E  
109 18°37'57.9"; and Grytsjön – N 59°52'21.1", E 18°52'53.6") and from the Baltic Sea (same  
110 location as above) on 4 July 2018 (Fig. S1). The distances of the three lakes from the Baltic  
111 Sea sampling location were 54.5 km (Lötsjön), 18.3 km (Erken) and 5.6 km (Grytsjön). The  
112 chemical characteristics of these lakes were slightly different, and altogether the  
113 concentrations of total carbon (TOC) and  $\text{PO}_4^{3-}$  increased, while  $\text{NO}_3^-$  decreased as lakes were  
114 located closer to the sea coast (Table S1). All samples were sequentially filtered to remove  
115 bacterial grazers, first through a 20  $\mu\text{m}$  net *in situ* to remove zooplankton and then through  
116 GF/F filters (0.7  $\mu\text{m}$ , Whatman, UK) prior inoculation to remove protozoans.

117 The dispersal source communities were established by inoculating 100 mL of GF/F  
118 filtered Baltic seawater into bottles containing 900 mL of cell-free Baltic Sea medium. The  
119 batch cultures were incubated at three different temperature levels (15, 20 and 25  $^{\circ}\text{C}$ ) in the  
120 dark with four replicates at each incubation temperature. The established dispersal source  
121 communities were used in the dispersal treatments and represented the late-arriving species  
122 arriving at different rates (Fig. 1).

123 To create the recipient communities of early-arriving species 50 mL of GF/F filtered  
124 lake water inocula was added to bottles containing 450 mL cell-free Baltic Sea medium, and  
125 incubated at three different temperature levels (15, 20 and 25  $^{\circ}\text{C}$ ) in dark with four replicates

126 at each incubation temperature. The incubation of recipient cultures was started with one day  
127 delay so that cell abundance would most likely be lower compared to the dispersal sources, in  
128 order to avoid strong dilution of the medium during the dispersal process (see below).

129

### 130 *Dispersal*

131 On day 7, after the successful establishment of recipient communities, measured as  
132 bacterial growth (Fig. S2), bacteria from the dispersal source communities were added to the  
133 recipient communities. The dispersal treatment consisted of one dispersal event at three  
134 different rates: no, low and high, wherein 0 %, 5 % and 20 % of the cells were exchanged  
135 with cells from the respective dispersal source (Fig. 1). For this, each replicate ‘A’ of the  
136 three recipient communities at the different incubation temperatures received cells from  
137 replicate ‘A’ of the dispersal source at the respective temperature level. Likewise, each  
138 replicate ‘B’ of the recipient communities received cells from replicate ‘B’ of the dispersal  
139 source and so on (Fig. 1). For this, we measured the bacterial abundances (for details see  
140 ‘Sample analyses’ below) in all cultures and calculated the volume that needed to be replaced.  
141 To reach an equal final volume (564 mL) in all cultures the differences were compensated by  
142 adding additional cell-free incubation medium that was kept at the same conditions  
143 throughout the entire experiment. One ‘additional medium’ bottle (kept at 20 °C), broke  
144 during the experiment, hence, a mixture of the two other medium bottles (kept at 15 and 25  
145 °C) were used after the dispersal treatments to reach equal volume in each incubation bottle.  
146 Both the cell exchange and the supply of additional medium were carried out under sterile  
147 conditions.

148

### 149 *Sample analyses*

150 Throughout the experiment, bacterial abundance was monitored (Fig. S2) using a  
151 CytoFLEX flow cytometer (Beckman Coulter, Indianapolis, IN, USA) with 2.27  $\mu\text{M}$  of  
152 SYTO 13 fluorescent nucleic acid stain (Invitrogen, Eugene, Oregon, USA).

153 To follow changes in environmental conditions in the cultures, samples for chemical  
154 analyses were collected three times: on day 1 after lake inocula were distributed into the  
155 medium, after the dispersal treatment (day 7), and on the last day of the experiment (day 22).  
156 Total phosphorus (TP), total nitrogen (TN) and total carbon (TOC) were measured  
157 spectrophotometrically (Perkin Elmer, Lambda 40, UV/VIS Spectrometer, Massachusetts,  
158 USA) and by catalytic thermal decomposition method (Shimadzu TNM-L, Kyoto, Japan),  
159 respectively according to standard procedures. Further, ion chromatograph was used to  
160 measure the concentrations of  $\text{NH}_4^+$ ,  $\text{NO}_3^-$ ,  $\text{PO}_4^{3-}$  as described previously [22].

161

#### 162 *Bacterial community composition*

163 At the end of the experiment (day 22), the cultures (564 mL) were filtered by vacuum  
164 filtration onto 0.2  $\mu\text{m}$  47 mm membrane filters (Supor-200, Pall Corporation, Port  
165 Washington, NY, USA). DNA extraction from the membrane filters was performed using the  
166 DNeasy PowerSoil Kit (Qiagen, Venlo, Netherlands). The 16S rRNA gene amplicons were  
167 prepared using a two-step PCR protocol described in detail in the protocol deposited to the  
168 protocols.io repository ([dx.doi.org/10.17504/protocols.io.6jmhck6](https://dx.doi.org/10.17504/protocols.io.6jmhck6)). Amplicon paired-end  
169 sequencing was performed on Illumina MiSeq platform at the SciLifeLab SNP&SEQ  
170 Technology Platform hosted by Uppsala University, using Illumina MiSeq v3 sequencing  
171 chemistry. Raw sequences have been deposited to the European Nucleotide Archive with the  
172 accession number PRJEB34383.

173 Sequences were processed using DADA2 pipeline [23] in R on the server of Uppsala  
174 Multidisciplinary Center for Advanced Computational Science (UPPMAX). First, forward

175 and reverse sequences were trimmed to 280 and 220 bp long, respectively, after quality  
176 filtering ( $\text{truncQ} = 2$ ) with maximum expected errors set to 2 and 5 for forward and reverse  
177 sequences, respectively. Secondly, sequences were dereplicated and sequence variants were  
178 inferred. Finally, chimeric sequences were removed and the final amplicon sequence variants  
179 (ASVs) were assigned against SILVA 132 core reference alignment [24].

180

### 181 *Data analyses*

182 All statistical analyses and visualizations were conducted in R version 3.3.2 [25]. The  
183 ASV table was analyzed using the packages ‘phyloseq’ [26] and ‘vegan’ [27]. Chloroplast  
184 ASVs and unassigned ASVs were discarded. Samples were rarified to an even depth of 6,366  
185 reads per sample that eventually resulted in an ASV matrix with 5,598 ASVs in 120 samples.  
186 The taxonomic distribution of reads was visualized with Krona  
187 (<http://sourceforge.net/projects/krona>).

188 Principal component analysis was applied to assess if dispersal treatments induced any  
189 differences in nutrient concentrations during the experiment, including original, unfiltered  
190 lake and Baltic Sea water samples as references. Differences in bacterial abundance in  
191 dependence of temperature and the origin of the recipient community was tested using a two-  
192 way ANOVA and a subsequent Tukey’s HSD test.

193 Differences in community composition among samples were tested with permutational  
194 multivariate analysis of variance (PERMANOVA, permutations: 999) using the *adonis*  
195 function in ‘vegan’ package [27] and visualized using non-metric multidimensional scaling  
196 (NMDS), both based on the abundance-based Bray-Curtis dissimilarities. In the absence of  
197 priority effects, the well-adapted late-arriving bacteria from the Baltic Sea dispersal source  
198 should outcompete the originally maladapted early-arriving lake bacteria of the recipient  
199 community. Hence, the composition of the recipient communities would converge completely



200 towards the dispersal source. On the opposite, we assumed the presence of priority effects  
201 when recipient community maintained a significant dissimilarity compared to the dispersal  
202 source. To assess to what extent the recipient community shifted towards the dispersal source  
203 as a measure of the strength of priority effects, we first calculated the Bray-Curtis  
204 dissimilarity between each recipient community and its respective dispersal source. Our  
205 assumption was that priority effects are the stronger the higher the dissimilarity between  
206 recipient communities and the dispersal source. In case of complete priority effects at the  
207 level of the entire community, the recipient community should completely maintain its  
208 dissimilarity from the dispersal source. Finally, to be able to specifically address how  
209 dispersal influenced the strength of potential priority effects, we subtracted the Bray-Curtis  
210 dissimilarities between the recipient and dispersal source in the dispersal treatments with that  
211 of the respective 0 % dispersal treatment. This was done to correct for shifts in community  
212 composition that occurred in the recipient communities in the absence of dispersal.

213 Priority effects at the population level were investigated by determining the relative  
214 abundance of early-arriving ASVs of the recipient communities that persisted after exposure  
215 to dispersal, and late-arriving ASVs of the dispersal source that established successfully in the  
216 recipient communities. For this, we identified ASVs that fall in the above-mentioned  
217 categories by performing differential abundance analyses at each temperature level using the  
218 ‘DESeq2’ package [28]. First, we selected the most abundant ASVs (> 0.5 % relative  
219 abundance) in each recipient community and the dispersal source. Then, we determined  
220 separately for each recipient community if the relative abundances (as a proxy for population  
221 size) of all abundant early-arriving ASVs changed after the effective dispersal treatment (i.e.,  
222 5 % and 20 % dispersal rate treatments) compared to their relative abundances in the no  
223 dispersal (0 %) communities. Here, we interpreted the lack of significant (adjusted  $p < 0.05$ )  
224 negative differences in relative abundances as a sign of priority effects and grouped them as

225 ‘persistent early-arriving ASVs’. On the other hand, if their relative abundances were  
226 significantly lower (adjusted  $p < 0.05$ ) in treatments receiving dispersal from the Baltic Sea,  
227 we categorized them as ‘forfeited early-arriving ASVs’. Second, for the late-arriving ASVs  
228 from the Baltic Sea dispersal source, we performed a conservative mixing analysis following  
229 Székely & Langenheder (2017). For this, we calculated for the most abundant ASVs’ ( $> 0.5$   
230 % in the dispersal source) their expected relative abundances in the dispersal rate treatments  
231 based on their relative abundances in the 0 % dispersal rate treatment and the dispersal source,  
232 and the applied cell exchange rates (i.e., 5 or 20 %). Thereafter we assessed the deviation of  
233 the measured abundances from the expected values. A non-significant deviation or a  
234 significantly (adjusted  $p < 0.05$ ) higher relative abundance of a late-arriving ASV compared  
235 to the expected one provides a sign of successful establishment, while a significantly  
236 (adjusted  $p < 0.05$ ) lower abundance indicates unsuccessful establishment of the late-arriving  
237 ASVs.

238 Finally, we used two-way ANOVAs to test how temperature and the origin of the  
239 recipient communities (inoculum origin) affected the community shift induced by dispersal  
240 and the relative abundance of persistent early-arriving ASVs and successfully established  
241 late-arriving ASVs., respectively.

242

243

## 244 **Results**

245

246 After the initial inoculation of early-arriving bacteria in the Baltic sea medium all  
247 recipient communities showed typical growth patterns of dilution cultures and increased in  
248 abundance at least until day 7 (Fig. S2). The temperature increase (i.e., 20 and 25 °C) resulted  
249 in significantly higher abundances on day 7 (two-way ANOVA,  $F_{\text{Temperature}} = 76.09$ ,  $p < 0.001$ ;

250 *post-hoc* Tukey's HSD test:  $p_{\text{adjusted}} < 0.05$ , Table S2), further, significantly differences by  
251 inoculum origin ( $F_{\text{Inoculum origin}} = 79.01$ ,  $p < 0.001$ ;  $F_{\text{Temperature} \times \text{Inoculum origin}} = 7.86$ ,  $p < 0.001$ ).  
252 Bacterial abundances remained stable throughout the experiment in all treatments. Despite  
253 some initial variation, the chemical conditions of the cultures inoculated with different  
254 recipient communities did not experience any pronounced shift or showed clustering patterns  
255 in response to the dispersal treatments (Fig. S3A) or to the different incubation temperatures  
256 (Fig. S3B).

257

258 The NMDS of the bacterial communities (Fig. 2) shows that without dispersal (i.e., 0  
259 % dispersal rate) all three recipient communities (Lötsjön, Erken and Grytsjön) were  
260 compositionally different (Fig. 2 orange dots; PERMANOVA:  $F_{\text{Inoculum origin}} = 9.96$ ,  $R^2 = 0.35$ ,  
261  $p = 0.001$ ), and were affected by the temperature manipulation ( $F_{\text{Temperature}} = 3.02$ ,  $R^2 = 0.11$ ,  $p$   
262  $= 0.001$ ). Meanwhile, the recipient communities exposed to dispersal (i.e., 5 and 20 %  
263 dispersal rate, brown and black dots) became more similar to the dispersal source (Fig 2; blue  
264 dots).

265 PERMANOVA results showed that the recipient communities exposed to dispersal  
266 were significantly dissimilar from the dispersal source in all cases (Table S3), thus, complete  
267 convergence to the dispersal source (i.e., complete absence of priority effects) did not occur in  
268 any of the communities. We found a similar pattern when assessing the degree of dissimilarity  
269 of recipient communities from the dispersal source, namely, that recipient communities  
270 receiving either 5 % or 20 % dispersal shifted towards the dispersal source, without a  
271 complete convergence (Bray-Curtis dissimilarity = 0), compared to the 0 % dispersal (Fig. 3).  
272 Recipient communities with the highest dispersal (i.e. 20 %) shifted the most towards the  
273 dispersal source (Fig. 3). When Bray-Curtis dissimilarities were calculated in relation to the 0  
274 % dispersal treatment to assess the degree of community shift induced by dispersal (as a

275 proxy for the strength of the priority effects), the shift was greater in the 20 % dispersal  
276 compared to 5 % dispersal rate treatment (Fig. 4). Both temperature and the inoculum origin  
277 of the recipient community had a significant effect on this relationship at 5 % dispersal (two-  
278 way ANOVA,  $F_{\text{Temperature}} = 5.97$ ,  $p = 0.006$ ,  $F_{\text{Inoculum origin}} = 5.76$ ,  $p = 0.007$ ), but not at 20 %  
279 dispersal (two-way ANOVA,  $F_{\text{Temperature}} = 1.99$ ,  $p = 0.153$ ,  $F_{\text{Inoculum origin}} = 0.33$ ,  $p = 0.724$ )  
280 (Fig. 4). This indicates that the strength of priority effects was affected by temperature and  
281 recipient community origin at 5 % dispersal but not at 20 %. There were no significant  
282 interactions between temperature and inoculum origin in any of the dispersal rates tested.

283

284 We further examined changes in the dynamics of early- and late-arriving ASVs in  
285 response to temperature changes. On a broad taxonomical level, we found that the most  
286 abundant (> 0.5 % relative abundance) bacterial ASVs in the early-arriving communities  
287 belonged to the class Alphaproteobacteria, Gammaproteobacteria and Bacteroidia (Fig. S4).  
288 The most abundant genera (top three) were *Brevundimonas*, *Pseudomonas*, *Allorhizobium*-  
289 *Neorhizobium-Pararhizobium-Rhizobium* (thereafter *A-N-P-R*) in the Löttsjön and Erken  
290 recipient communities and *Limmobacter*, *Algoriphagus* and *A-N-P-R* in the Grytsjön recipient  
291 communities (Fig. S4). The most abundant (> 0.5% relative abundance) members of the  
292 dispersal source communities (i.e., late-arriving bacteria) were ASVs belonging to  
293 Alphaproteobacteria (mainly *Loktanella*, *A-N-P-R* and *Roseibacterium*),  
294 Gammaproteobacteria (mainly *Hydrogenophaga*, *Pseudomonas*, *Rheinheimera*) and  
295 Bacteroidia (mainly *Algoriphagus*) (Fig. S4, Baltic Sea).

296 Differential abundance analyses revealed numerous ASVs of the most abundant  
297 genera (> 0.5 %) that could be classified as either ‘persistent’ or ‘forfeited’ early-arriving  
298 ASVs or did undergo an (un)successful establishment as late-arriving ASVs (see Methods).  
299 We identified several persistent early-arriving ASVs that taxonomically differed between the

300 three recipient communities (Fig. 5, Fig. S5). Specifically, in the Löttsjön recipient  
301 communities, ASVs of *A-N-P-R*, *Brevundimonas*, *Pseudomonas* and *Rheinheimera*; in Erken  
302 recipient communities, ASVs of *Flavobacterium*, *A-N-P-R*, *Brevundimonas*, *Pseudomonas*,  
303 *Rheinheimera*, *Hydrogenophaga* and *Novosphingobium* were persistent, while in Grytsjön  
304 recipient communities, ASVs of *A-N-P-R*, *Sphingorhabdus*, *Limnobacter* and *Rheinheimera*  
305 showed persistence (i.e., did not show significant ( $p_{\text{adjusted}} < 0.05$ ) changes in relative  
306 abundance in the dispersal treatments) (Fig. S5). However, there were also inconsistencies  
307 because ASVs from the same genera (e.g. *Pseudomonas*, *Flavobacterium* and *Rheinheimera*)  
308 could be categorized both as forfeited and persistent early-arriving bacteria. Interestingly,  
309 changes in the composition of persistent early-arriving ASVs were found as the temperature  
310 level increased. For example, there was a general trend showing that *Flavobacterium* and  
311 *Rheinheimera* were more persistent at lower temperature (15 °C and 20 °C) than at the highest  
312 temperature level (25 °C). In contrast, *Brevundimonas* and not abundant members of  
313 Bacteroidia (i.e. *Comamonas*, *Curvibacter*; grouped as ‘other\_Bacteroidia’ in Fig. 5) tended  
314 to be more abundant and persistent at higher temperatures. Temperature and inoculum origin  
315 had no effect on the total relative abundance of the persistent early-arriving ASVs in the  
316 recipient communities with different dispersal treatments (two-way ANOVA at 5 % dispersal:  
317  $F_{\text{temperature}} = 2.38$ ,  $p = 0.109$ ,  $F_{\text{inoculum origin}} = 1.95$ ,  $p = 0.159$ ; 20 % dispersal:  $F_{\text{temperature}} = 0.74$ ,  
318  $p = 0.488$ ,  $F_{\text{inoculum origin}} = 0.59$ ,  $p = 0.562$ , no significant interactions in either case) (Fig. 5).

319 Among late-arriving bacteria, mainly ASVs of *Algoriphagus*, *Loktanella*,  
320 *Roseibacterium*, *Hydrogenophaga* were the ones that showed successful establishment, thus,  
321 maintained or significantly increased (adjusted  $p < 0.05$ ) their relative abundances after being  
322 dispersed into recipient communities (Fig. 6, Fig. S6). The composition of successfully  
323 established late-arriving bacteria was similar regardless of the recipient communities into  
324 which they were dispersed. Their total relative abundances decreased with warming in both

325 the 5% and 20 % dispersal treatments and differed between recipient communities with  
326 different inoculum origin (two-way ANOVA at 5 % dispersal:  $F_{\text{temperature}} = 7.80$ ,  $p = 0.002$ ,  
327  $F_{\text{inoculum origin}} = 3.83$ ,  $p = 0.033$ ; at 20 % dispersal:  $F_{\text{temperature}} = 7.34$ ,  $p = 0.002$ ,  $F_{\text{inoculum origin}} =$   
328  $4.79$ ,  $p = 0.015$ , no significant interactions in either case) (Fig. 6). Among the populations  
329 most impacted by warming were *Loktanella*, *Hydrogenophaga* and *Pseudomonas*, thus,  
330 showed decrease in relative abundance at higher temperature levels (20 and 25 °C) (Fig. 6,  
331 Fig. S6).

332

333

## 334 Discussion

335

336 Our study shows that warming has the potential to promote priority effects, but that it  
337 depends (i) on the rate of dispersal of late-arriving better adapted communities into recipient  
338 communities and (ii) on the composition of the recipient community. More specifically, and  
339 in agreement with previous studies that have used similar approaches to ours [18, 19], we  
340 found evidence of priority effects in aquatic bacterial communities. We also found that  
341 dispersal of the late-arriving bacteria induced some species replacement, i.e. decreased  
342 priority effects, because all recipient communities converged towards the dispersal source  
343 communities to some extent. However, warming could reduce such effects of dispersal, even  
344 though this effect varied among recipient communities (Fig. 4).

345 Dispersal events in bacterial communities from nature are complex and involve  
346 mixing or coalescence of entire communities [29], which we tried to mimic in our study.  
347 Therefore, it is difficult to relate our results to previous studies that have primarily focused on  
348 priority effects related to differences in the assembly history of individual species or strains  
349 [1]. Thus, in this study we aimed to upscale the number of studied species involved in priority

350 effects compared to previous studies by investigating the roles of the members of complex  
351 communities. Our findings represent, to our knowledge, the first experimental evidence that  
352 temperature-dependency of priority effects can occur in pelagic bacterial communities  
353 wherein different bacterial groups are involved in different ways. The warming effect could  
354 be seen at the population level since less successful establishment of late-arriving ASVs were  
355 found in the recipient communities in response to increasing temperature. Specifically, in the  
356 case of the recipient communities, the total relative abundance of successfully established  
357 ASVs generally decreased with increasing temperature, whereas the relative abundance of  
358 persistent early arriving ASVs tended to show the opposite trends, even though this was not  
359 significant in any case.

360         One possible explanation for the lower establishment success and stronger persistence  
361 of resident species at higher temperatures is that the resistance of recipient communities to  
362 invasion (dispersal) by late-arriving bacteria increased as a result of temperature-stimulated  
363 high growth rates of the early-arriving bacteria (see Fig. S2 and Table S2). Similarly,  
364 Grainger *et al.* (2018) demonstrated that increased temperature increased growth rates of  
365 aphid species, thus, allowing them to more rapidly change and deplete resources which  
366 altogether increased the competitive exclusions of competitor species that arrived late. In our  
367 experiment, such effects appeared to be generally stronger at 5 compared to 20 % dispersal  
368 rates. This highlights that dispersal rates are an important mediator of the strength of priority  
369 effects in natural communities, and that this strength in general is likely to be higher if  
370 dispersal rates are relatively low [6].

371         We identified several persistent early-arriving ASVs that taxonomically differed  
372 between the three sets of recipient communities. Hence, distinct sequence variants (ASVs) of  
373 early-arriving bacteria played a role in maintaining priority effects. However, we also found  
374 that there can be inconsistencies at the genus level in the response to dispersal of different

375 sequence variants as ASVs belonging to the very same genus (e.g., *Pseudomonas*,  
376 *Flavobacterium* and *Rheinheimera*) can be categorized both as persistent and forfeited ASVs.  
377 This corroborates results of other recent studies [30, 31] that emphasize the importance to  
378 evaluate population level dynamics at the deepest taxonomical resolution possible. Moreover,  
379 the composition of persistent early-arriving ASVs differed between the different temperature  
380 treatments, suggesting that, as temperature conditions change, the identity of bacterial  
381 populations that maintain priority effects changes as well. On the other hand, in the case of  
382 the dispersal source community, we found consistency in the identity of the successfully  
383 established late-arriving ASVs as, irrespective of the identity of the recipient community or  
384 the temperature treatment, they typically belonged to the same genera. In summary, our  
385 findings suggest that different species can be involved in the development of priority effects  
386 of aquatic bacterial communities under different circumstances. Since similar results have  
387 been obtained in a number of studies [1, 9, 19, 21] of different complexity, our results suggest  
388 that species' responses to invasion at the community level are difficult to predict.

389

390 The lake inocula included for the preparation of the recipient communities in this  
391 study differed in their geographical distance to the dispersal source (the late-arriving bacteria  
392 from the Baltic Sea). Therefore, we presumed that recipient communities closer to the Baltic  
393 Sea might have been exposed to dispersal from the Baltic Sea in their recent history to a  
394 greater extent than those farther from the Baltic. This could have resulted in a larger shared  
395 species pool, including larger numbers of bacteria of Baltic Sea origin in local lake seed banks  
396 [32]. We therefore presumed that the potentially higher numbers of species that are adapted to  
397 environmental conditions in the Baltic Sea in recipient communities closer to the Baltic would  
398 lead to stronger priority effects. Our results do, however, not support this idea because the  
399 dissimilarities between the recipient and dispersal source communities were similarly high in



400 all cases (see Fig. 3). Hence, the results do not support our hypothesis of stronger priority  
401 effects in lakes closer to the Baltic Sea. Further, it suggests that the shared species pools with  
402 the Baltic Sea, including local seed banks of Baltic Sea taxa, were equally low irrespective of  
403 the distance of the lake to the Baltic Sea. There were nevertheless differences among lakes  
404 regarding the pattern of how temperature affected dispersal-induced shifts in community  
405 composition at the community level and the total relative abundance of persistent early  
406 arriving ASVs and successfully established late ASVs. These differences might be the  
407 consequence of the differences of chemical characteristic of the three lakes, or the result of  
408 intrinsic differences in traits (e.g. temperature optima) of ASVs that contribute to priority  
409 effects in the different lakes that we cannot disentangle in our study.

410

411 Priority effects can be due to two distinct mechanisms: niche-modification and niche  
412 preemption [2], but providing insights into the mechanisms underlying priority effects is  
413 difficult. In our experiment niche modification-driven priority effects of the different lake  
414 inocula should have influenced the identities of the successfully established late-arriving  
415 bacteria, which was, however, not the case. On the contrary, niche preemption might have had  
416 an influence in communities grown at increased temperatures (20 and 25 °C) as communities  
417 had attained higher abundances at the time when the dispersal source was added, while the  
418 establishment success of late-arriving ASVs decreased with increasing temperatures (see Fig.  
419 6). This indicates that the availability of resources was probably reduced to such an extent in  
420 20 and 25 °C treatments that this limited the abundances of late-arriving bacteria.

421

422 In addition to warming and dispersal there might be other factors that can influence  
423 the importance of priority effects in natural bacterial communities. For instance, it remains  
424 unclear what would happen in the presence of predation (e.g., bacterial grazers) or multi-level

425 trophic interactions. A few previous studies on zooplankton communities suggested that  
426 predation can be an important factor and can either reduce priority effects [16, 33], or, in  
427 contrast, indirectly promote them [34]. However, we lack a comprehensive knowledge on  
428 how predation could affect priority effects in particular in microbial communities. Another  
429 aspect that need to be considered are temperature fluctuations that can promote the  
430 immigration success of dispersed species and maintain multiple species coexistence, thus,  
431 reducing historical contingency [9, 35, 36].

432

433         Organisms across multiple kingdoms might be negatively affected by global warming,  
434 altering their ecosystem functions [11, 37–39]. Temperature has been shown to stimulate  
435 microbial invasions (e.g., spread of vibrios; Vezzulli *et al.* 2012) and influence the  
436 biogeographical patterns of microbes [41]. However, priority effects could play an important  
437 role by dampening the establishment success of invasive bacteria [42]. Our experimental  
438 study shows that this can be the case also in aquatic bacterial communities where early-  
439 arriving species, through priority effects, may to some extent be more resistant to invasion of  
440 late-arriving bacteria from an external dispersal source at higher temperatures. However, our  
441 findings also highlight that the overall strength of warming-enhanced priority effects is  
442 context dependent and differs depending on the composition of early-arriving communities as  
443 well as dispersal rates of the late-arriving ones.

444

#### 445 **Acknowledgements**

446

447 We thank Vasiliki Papazachariou for her help and assistance during field sampling and the  
448 experiment. We are also grateful for Christoffer Bergvall for his help in the chemical analyses  
449 of samples. This research was supported by the Swedish Research Council and the Malméns

450 Foundation. Further financial support was received by a grant to A.J.S from the Swedish  
451 Research Council Formas.

452

### 453 **Conflict of interest**

454

455 The authors declare that they have no conflict of interest.

456

### 457 **References**

458

- 459 1. Fukami T, Beaumont HJE, Zhang X-X, Rainey PB. Immigration history controls  
460 diversification in experimental adaptive radiation. *Nature* 2007; **446**: 436–439.
- 461 2. Fukami T. Historical contingency in community assembly: integrating niches,  
462 species pools, and priority effects. *Annu Rev Ecol Evol Syst* 2015; **46**: 1–23.
- 463 3. Lockwood JL, Powell RD, Nott MP, Pimm SL. Assembling ecological communities in  
464 time and space. *Oikos* 1997; **80**: 549–553.
- 465 4. De Meester L, Gómez A, Okamura B, Schwenk K. The Monopolization Hypothesis  
466 and the dispersal–gene flow paradox in aquatic organisms. *Acta Oecologica* 2002; **23**:  
467 121–135.
- 468 5. De Meester L, Vanoverbeke J, Kilsdonk LJ, Urban MC. Evolving Perspectives on  
469 Monopolization and Priority Effects. *Trends Ecol Evol* 2016; **31**: 136–146.
- 470 6. Loeuille N, Leibold MA. Evolution in Metacommunities: On the Relative Importance  
471 of Species Sorting and Monopolization in Structuring Communities. *Am Nat* 2008;  
472 **171**: 788–799.
- 473 7. Declerck SAJ, Winter C, Shurin JB, Suttle CA, Matthews B. Effects of patch  
474 connectivity and heterogeneity on metacommunity structure of planktonic bacteria and

- 475 viruses. *ISME J* 2013; **7**: 533–542.
- 476 8. Vass M, Langenheder S. The legacy of the past: effects of historical processes on  
477 microbial metacommunities. *Aquat Microb Ecol* 2017; **79**: 13–19.
- 478 9. Tucker CM, Fukami T. Environmental variability counteracts priority effects to  
479 facilitate species coexistence: evidence from nectar microbes. *Proc Biol Sci* 2014; **281**:  
480 20132637.
- 481 10. Székely AJ, Langenheder S. Dispersal timing and drought history influence the  
482 response of bacterioplankton to drying–rewetting stress. *ISME J* 2017; **11**: 1764–1776.
- 483 11. Rudolf VHW, Singh M. Disentangling climate change effects on species interactions:  
484 effects of temperature, phenological shifts, and body size. *Oecologia* 2013; **173**: 1043–  
485 1052.
- 486 12. Chase JM. Stochastic Community Assembly Causes Higher Biodiversity in More  
487 Productive Environments. *Science (80- )* 2010; **328**: 1388–1391.
- 488 13. IPCC. Climate Change 2014: Synthesis Report. *Contribution of Working Groups I, II*  
489 *and III to the Fifth Assessment Report of the Intergovernmental Panel on Climate*  
490 *Change [Core Writing Team, R.K. Pachauri and L.A. Meyer, (eds.)]* . 2014.
- 491 14. Grainger TN, Rego AI, Gilbert B. Temperature-Dependent Species Interactions Shape  
492 Priority Effects and the Persistence of Unequal Competitors. *Am Nat* 2018; **191**: 197–  
493 209.
- 494 15. Grainger TN, Letten AD, Gilbert B, Fukami T. Applying modern coexistence theory to  
495 priority effects. *Proc Natl Acad Sci* 2019; **116**: 201803122.
- 496 16. Louette G, De Meester L. Predation and priority effects in experimental zooplankton  
497 communities. *Oikos* 2007; **116**: 419–426.
- 498 17. Peay KG, Belisle M, Fukami T. Phylogenetic relatedness predicts priority effects in  
499 nectar yeast communities. *Proc Biol Sci* 2012; **279**: 749–58.

- 500 18. Svoboda P, Lindström ES, Ahmed Osman O, Langenheder S. Dispersal timing  
501 determines the importance of priority effects in bacterial communities. *ISME J* 2017;  
502 1–3.
- 503 19. Rummens K, De Meester L, Souffreau C. Inoculation history affects community  
504 composition in experimental freshwater bacterioplankton communities. *Environ*  
505 *Microbiol* 2018; **20**: 1120–1133.
- 506 20. Andersson MGI, Berga M, Lindström ES, Langenheder S. The spatial structure of  
507 bacterial communities is influenced by historical environmental conditions. *Ecology*  
508 2014; **95**: 1134–1140.
- 509 21. Brislawn CJ, Graham EB, Dana K, Ihardt P, Fansler SJ, Chrisler WB, et al. Forfeiting  
510 the priority effect: turnover defines biofilm community succession. *ISME J* 2019;  
511 1865–1877.
- 512 22. Attermeyer K, Andersson S, Catalán N, Einarsdottir K, Groeneveld M, Székely AJ, et  
513 al. Potential terrestrial influence on transparent exopolymer particle concentrations in  
514 boreal freshwaters. *Limnol Oceanogr* 2019; 1–12.
- 515 23. Callahan BJ, McMurdie PJ, Rosen MJ, Han AW, Johnson AJA, Holmes SP. DADA2:  
516 High-resolution sample inference from Illumina amplicon data. *Nat Methods* 2016; **13**:  
517 581–583.
- 518 24. Quast C, Pruesse E, Yilmaz P, Gerken J, Schweer T, Yarza P, et al. The SILVA  
519 ribosomal RNA gene database project: Improved data processing and web-based tools.  
520 *Nucleic Acids Res* 2013; **41**.
- 521 25. R Core Team. R: A Language and Environment for Statistical Computing. *R*  
522 *Foundation for Statistical Computing, Vienna Austria*. <https://www.r-project.org>.
- 523 26. McMurdie PJ, Holmes S. phyloseq: An R Package for Reproducible Interactive  
524 Analysis and Graphics of Microbiome Census Data. *PLoS One* 2013; **8**: e61217.

- 525 27. Oksanen J, Blanchet F, Kindt R, Legendre P, O’Hara R. Vegan: community ecology  
526 package. *R Packag* 23-3 . 2016.
- 527 28. Love MI, Huber W, Anders S. Moderated estimation of fold change and dispersion for  
528 RNA-seq data with DESeq2. *Genome Biol* 2014; **15**: 550.
- 529 29. Rillig MC, Antonovics J, Caruso T, Lehmann A, Powell JR, Veresoglou SD, et al.  
530 Interchange of entire communities: Microbial community coalescence. *Trends Ecol*  
531 *Evol* 2015; **30**: 470–476.
- 532 30. Needham DM, Sachdeva R, Fuhrman JA. Ecological dynamics and co-occurrence  
533 among marine phytoplankton, bacteria and myoviruses shows microdiversity matters.  
534 *ISME J* 2017; **11**: 1614–1629.
- 535 31. García-García N, Tamames J, Linz AM, Pedrós-Alió C, Puente-Sánchez F.  
536 Microdiversity ensures the maintenance of functional microbial communities under  
537 changing environmental conditions. *ISME J* 2019; 2969–2983.
- 538 32. Comte J, Lindström ES, Eiler A, Langenheder S. Can marine bacteria be recruited from  
539 freshwater sources and the air? *ISME J* 2014; **8**: 2423–2430.
- 540 33. Berga M, Östman Ö, Lindström ES, Langenheder S. Combined effects of zooplankton  
541 grazing and dispersal on the diversity and assembly mechanisms of bacterial  
542 metacommunities. *Environ Microbiol* 2015; **17**: 2275–2287.
- 543 34. Ryberg WA, Smith KG, Chase JM. Predators alter the scaling of diversity in prey  
544 metacommunities. *Oikos* 2012; **121**: 1995–2000.
- 545 35. Toju H, Vannette RL, Gauthier MPL, Dhami MK, Fukami T. Priority effects can  
546 persist across floral generations in nectar microbial metacommunities. *Oikos* 2018;  
547 **127**: 345–352.
- 548 36. Litchman E. Invisible invaders: Non-pathogenic invasive microbes in aquatic and  
549 terrestrial ecosystems. *Ecol Lett* 2010; **13**: 1560–1572.

- 550 37. Dong W, Song A, Liu X, Yu B, Wang B, Lu Y, et al. Warming differentially altered  
551 multidimensional soil legacy induced by past land use history. *Sci Rep* 2018; **8**: 1–10.
- 552 38. Altermatt F, Pajunen VI, Ebert D. Climate change affects colonization dynamics in a  
553 metacommunity of three *Daphnia* species. *Glob Chang Biol* 2008; **14**: 1209–1220.
- 554 39. Hall EK, Neuhauser C, Cotner JB. Toward a mechanistic understanding of how natural  
555 bacterial communities respond to changes in temperature in aquatic ecosystems. *ISME*  
556 *J* 2008.
- 557 40. Vezzulli L, Brettar I, Pezzati E, Reid PC, Colwell RR, Höfle MG, et al. Long-term  
558 effects of ocean warming on the prokaryotic community: Evidence from the vibrios.  
559 *ISME J* 2012; **6**: 21–30.
- 560 41. Amalfitano S, Coci M, Corno G, Luna GM. A microbial perspective on biological  
561 invasions in aquatic ecosystems. *Hydrobiologia* 2014; **746**: 13–22.
- 562 42. Thomsen MS, Olden JD, Wernberg T, Griffin JN, Silliman BR. A broad framework to  
563 organize and compare ecological invasion impacts. *Environ Res* 2011; **111**: 899–908.
- 564

565 **Figure 1.** Experimental design of the study. The recipient communities were comprised of  
566 three different lake inocula (Erken, Lötsjön or Grytsjön, indicated by the different cell colors)  
567 inoculated separately into ‘foreign’ Baltic Sea incubation medium. The three lake inocula  
568 differed in their geographical distance from the Baltic Sea, with Grytsjön (in blue) being  
569 closest and Lötsjön (red) farthest away. The dispersal source constituted of the Baltic Sea  
570 community (dark blue cells) inoculated into cell-free incubation medium. Both the recipient  
571 (early-arriving species) and the dispersal source (late-arriving species) communities were  
572 incubated at three different temperatures (15, 20 and 25 °C). Three different dispersal  
573 treatments (cell exchange) were applied by replacing 0 %, 5 % and 20 % cells in the recipient  
574 communities with cells from the dispersal source. Black and grey arrows represent the  
575 direction of the dispersal treatments. The experiment was carried out in four replicates for all  
576 treatments and for all recipient and dispersal communities. The recipient communities were  
577 always dispersed with the corresponding dispersal source replicate at the respective  
578 temperature level. Community convergence induced by dispersal was tested by measuring  
579 Bray-Curtis community dissimilarities between recipient and dispersal source communities as  
580 an indicator of the strength of priority effects: the less the communities converge toward the  
581 dispersal source, i.e., the more resistant recipient communities are against dispersal, the  
582 stronger are priority effects. The main hypothesis to be tested is that the strength of priority  
583 effects increases with temperature.

584

585 **Figure 2.** Non-metric multidimensional scaling (NMDS) plots derived from abundance-based  
586 Bray-Curtis dissimilarities of bacterial community composition at the three temperature levels  
587 by the end of the experiment. Note that cultures with Baltic Sea inoculum were used as the  
588 dispersal source, while cultures with lake inocula (Grytsjön, Erken and Lötsjön) were used as  
589 recipient communities. All cultures were grown in Baltic Sea medium. Symbols are shaped



590 and colored by inoculum origin and dispersal treatment, respectively. Goodness of fit (stress  
591 value): 0.105.

592

593 **Figure 3.** Distance of recipient communities from the dispersal source (late-arriving species)  
594 communities (based on Bray-Curtis dissimilarity) at different temperature levels. Recipient  
595 communities were exposed to either 0, 5 or 20 % dispersal (cell exchange) from the dispersal  
596 source.

597

598 **Figure 4.** Dispersal-induced shifts in community composition in relation to temperature.  
599 Differences in Bray-Curtis dissimilarities between recipient communities and the dispersal  
600 source in the 5 and 20% dispersal treatments in relation to the 0 % dispersal treatment.

601

602 **Figure 5.** Changes in the relative abundances of persistent early-arriving species (ASVs > 0.5  
603 % relative abundance) in the different dispersal (5 % or 20 %) and temperature treatments  
604 (15, 20 and 25 °C). ASVs are grouped by bacterial genus and were identified by differential  
605 abundance analysis (see Methods for the assessment procedure and Figure S6 for further  
606 results). *A-N-P-R* refers to the genus *Allorhizobium-Neorhizobium-Pararhizobium-Rhizobium*.

607

608 **Figure 6.** Changes in the relative abundances of successfully established late-arriving species  
609 (ASVs, > 0.5 % relative abundance) in the different dispersal (5 % or 20 %) and temperature  
610 treatments (15, 20 and 25 °C). ASVs are grouped by bacterial genus and were identified by  
611 differential abundance analysis (see Methods for the assessment procedure and Figure S7 for  
612 further results).

613

Expected strength of priority effects

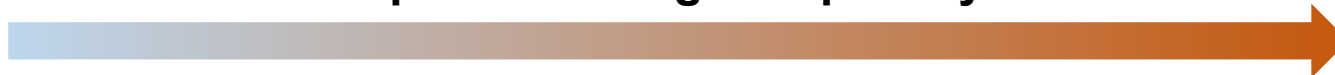

Temperature level

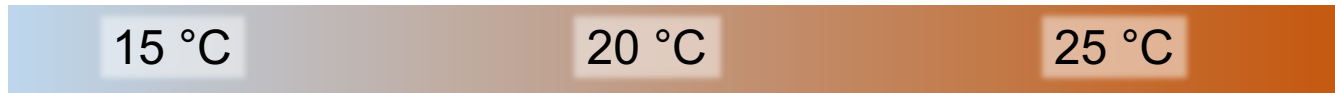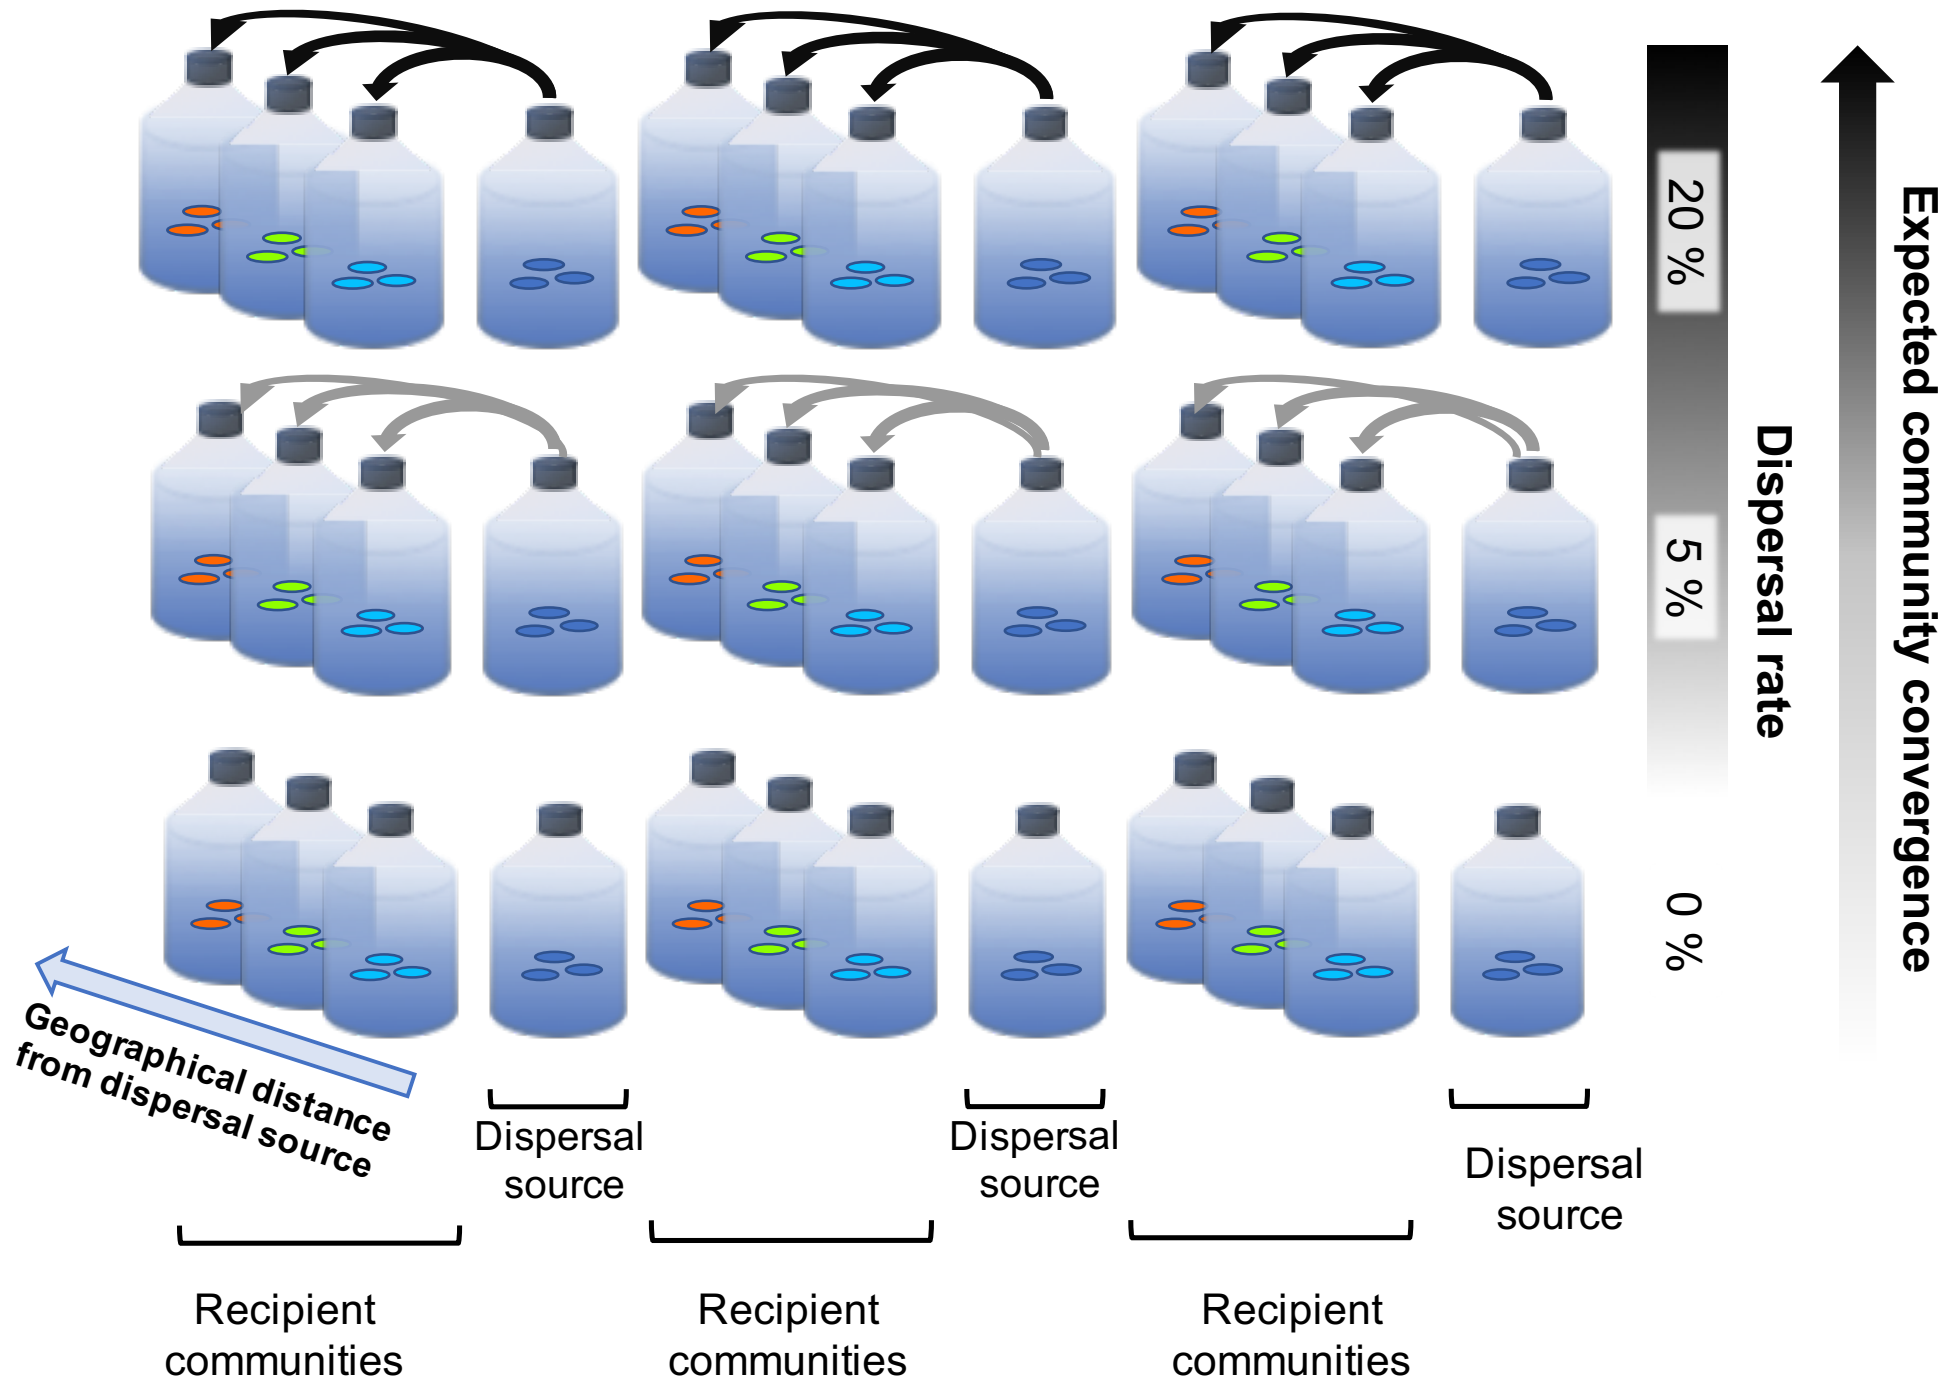

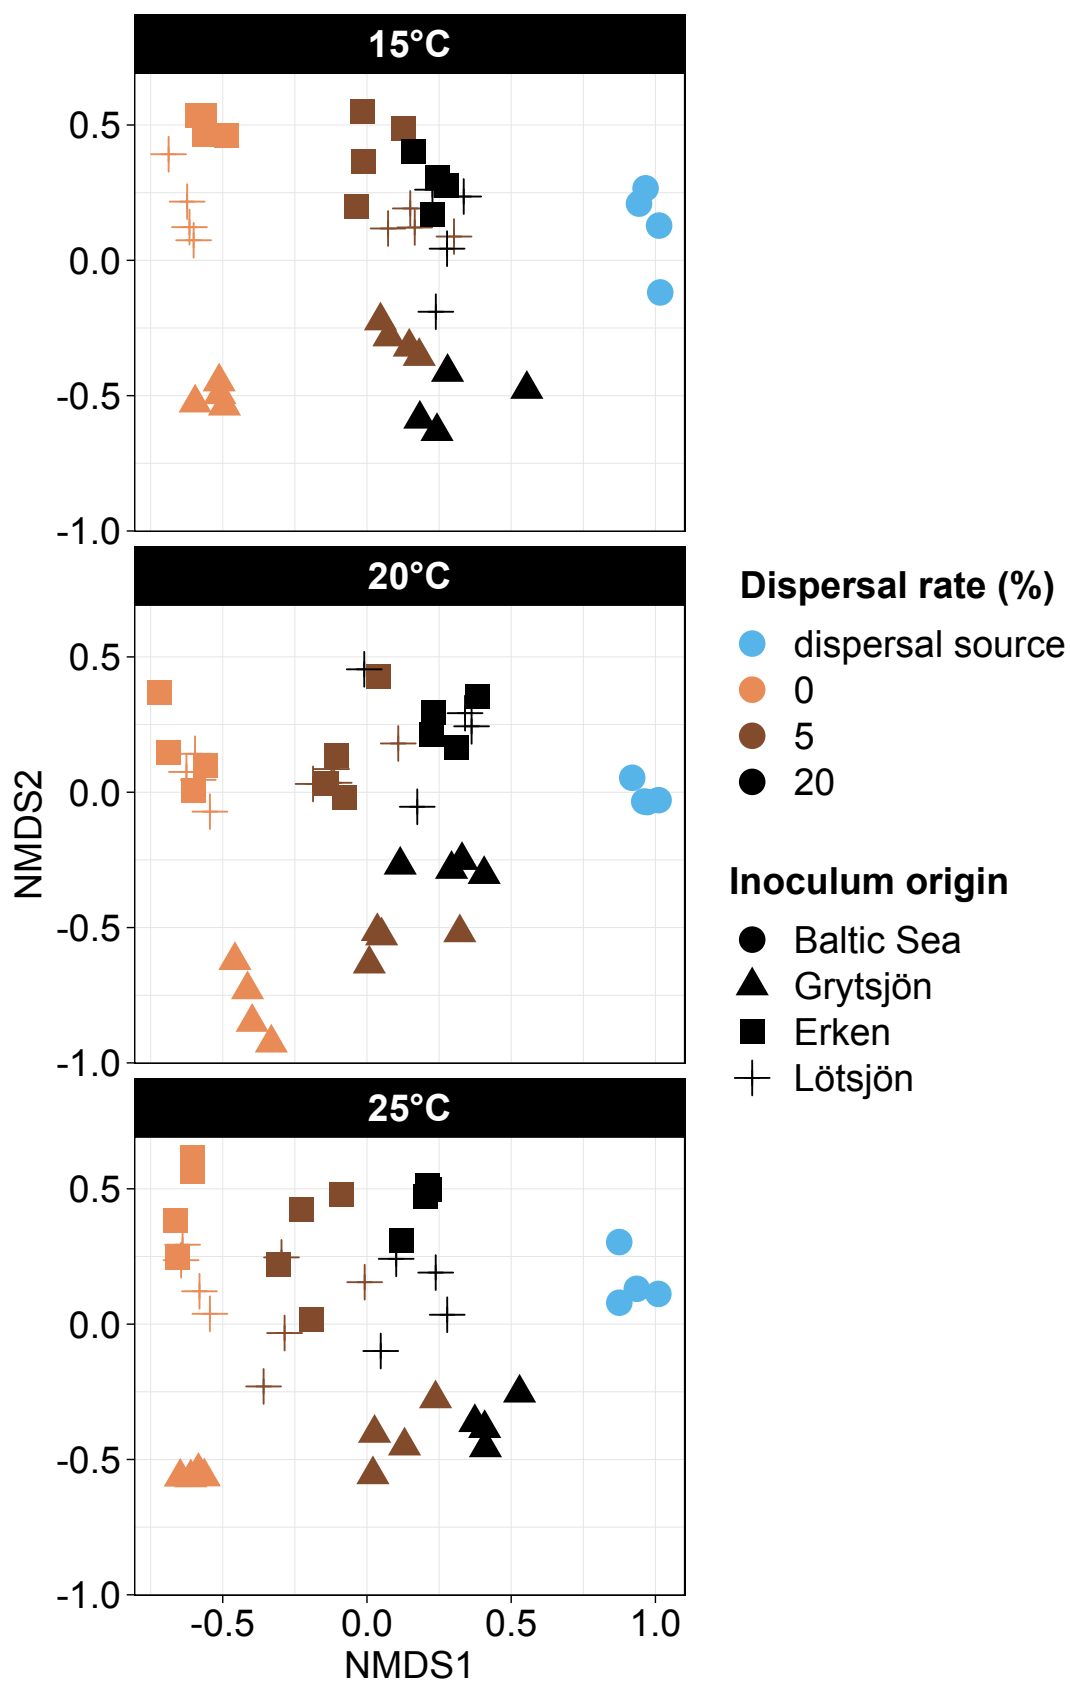

Distance of recipient communities  
from the dispersal source

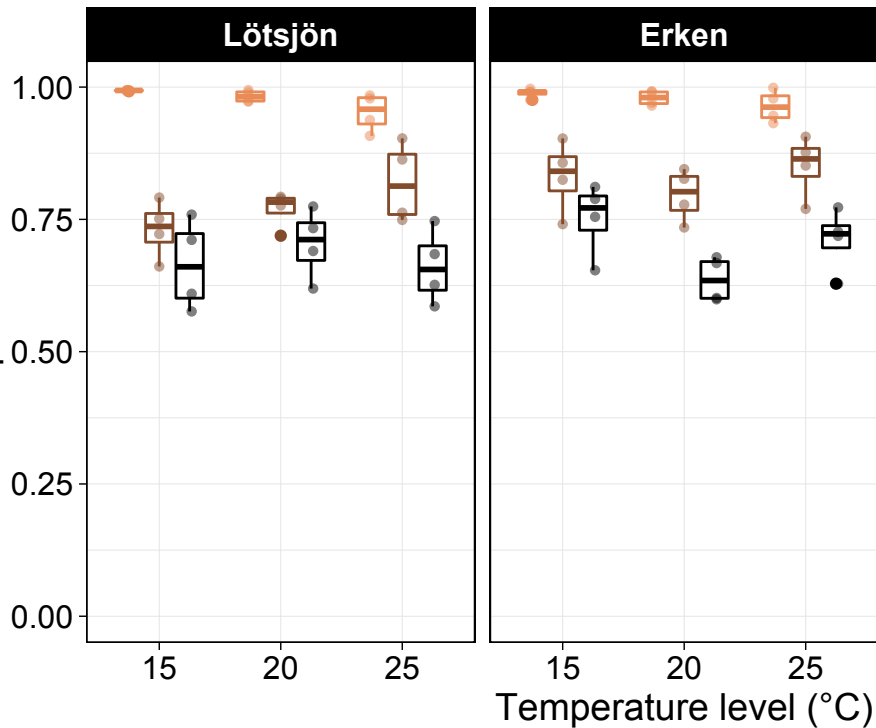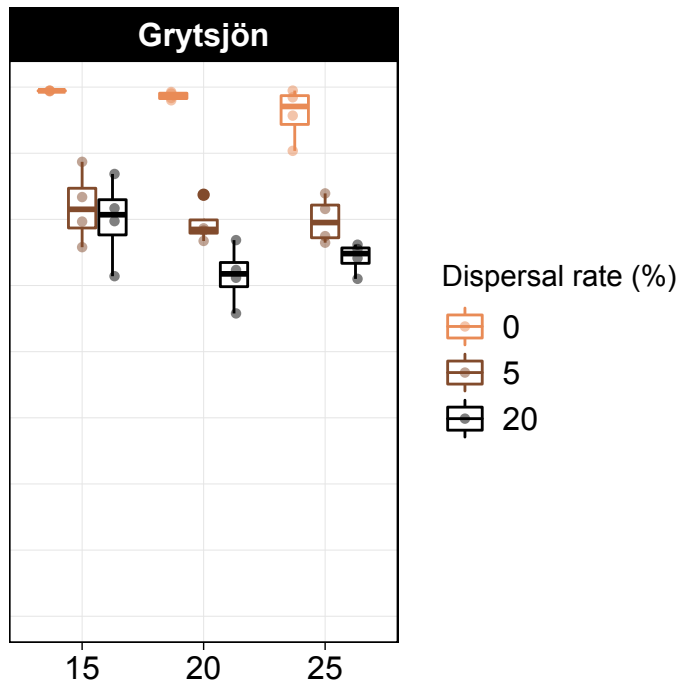

Dispersal rate (%)

0

5

20

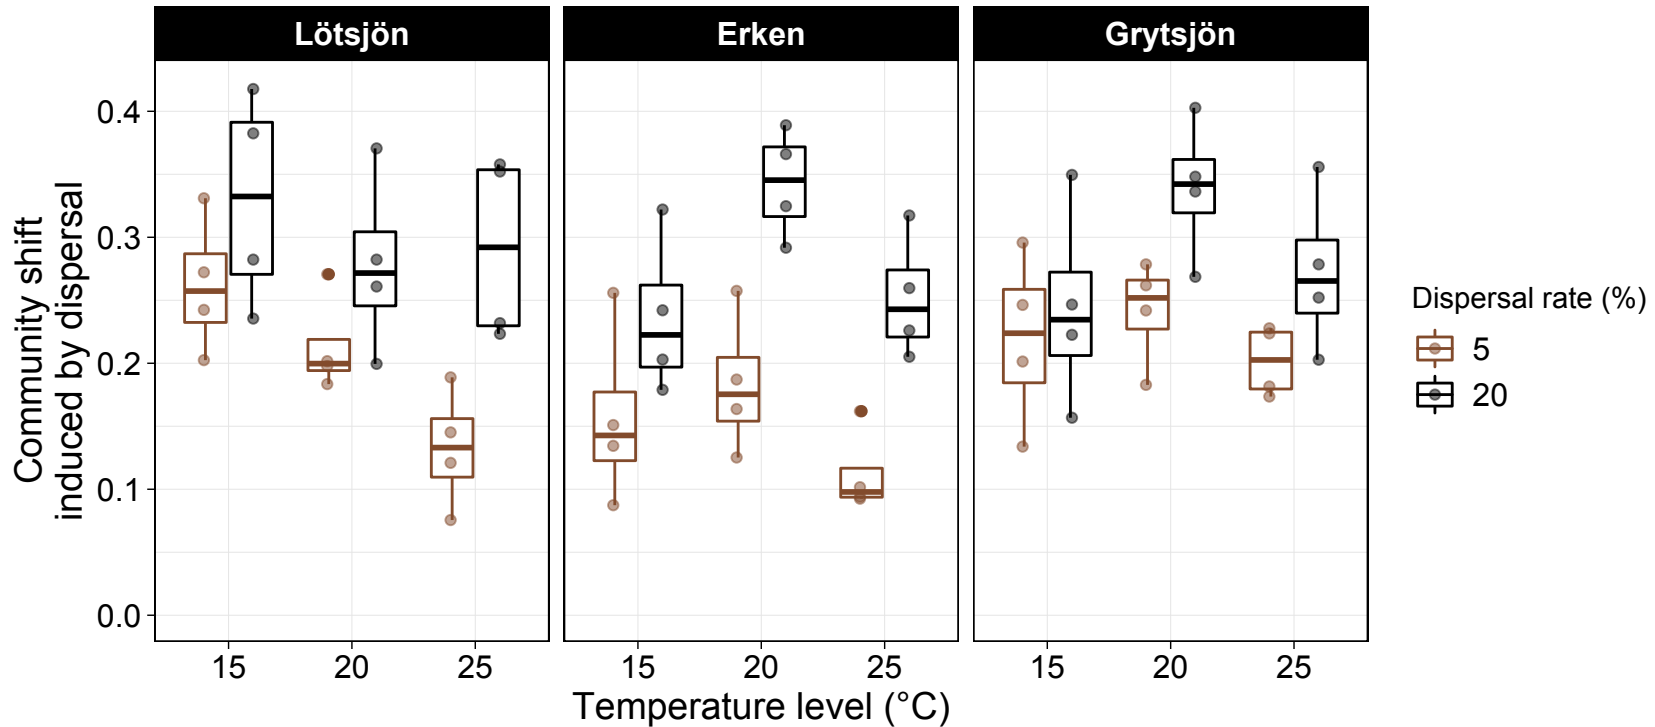

# Persistent early-arriving ASVs

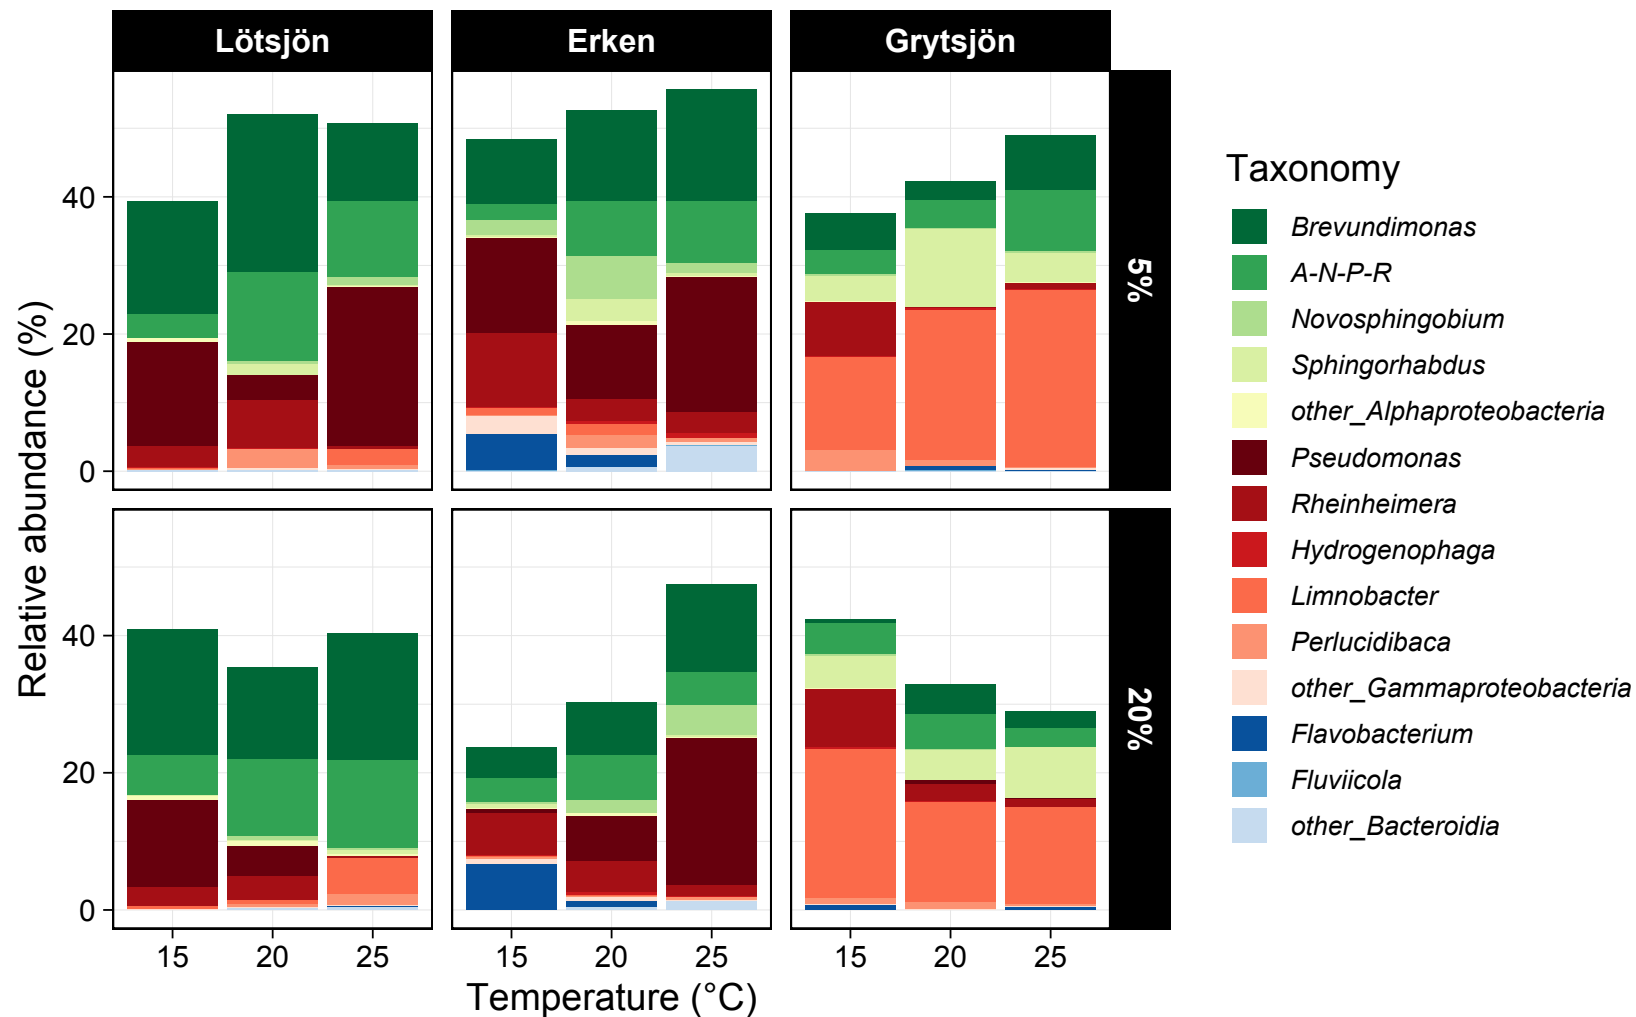

# Successfully established late-arriving ASVs

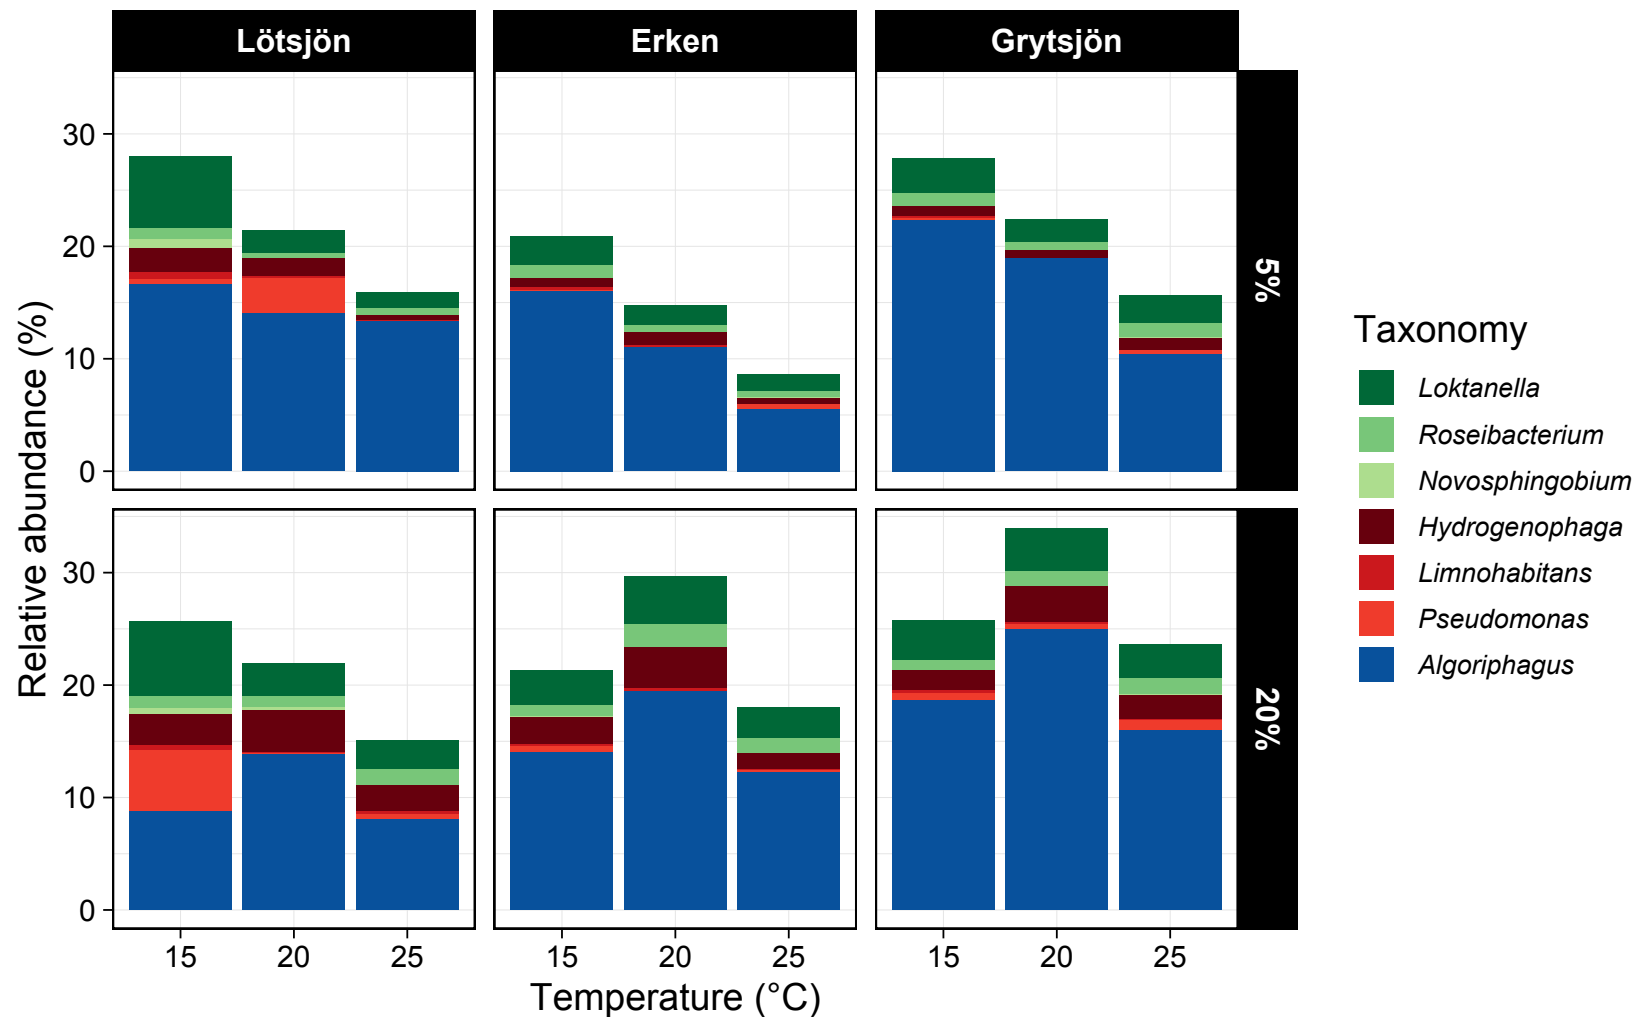

Source: https://www.biorxiv.org/content/10.1101/2020.01.27.921726v1.full.pdf
